# Supplementary material
Source: Springer Nature journal article supplement (https://www.springermedizin.de/resource/supplementary/12889_2008_1702_MOESM5_ESM.pdf/9503762)

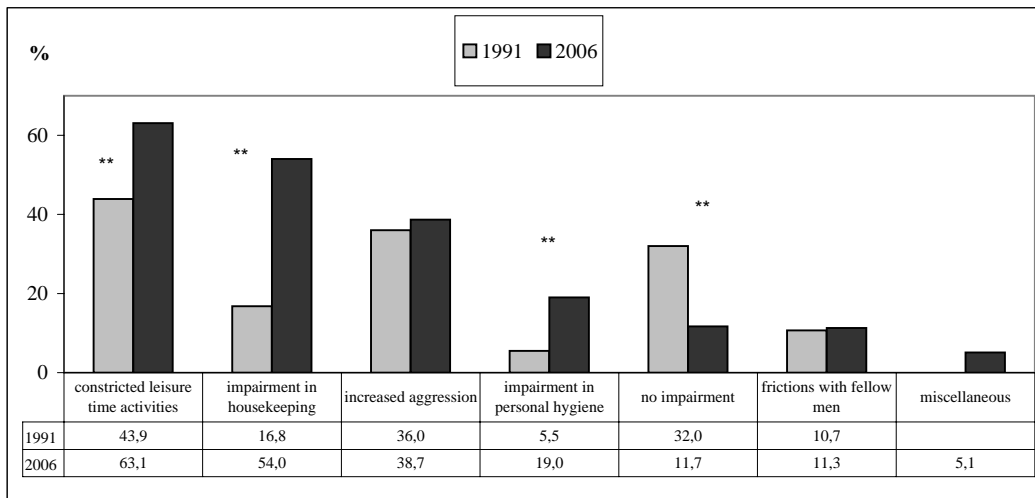

Supplement: MOESM5 [file 9503762]
